# Supplementary material for: Developing a patient-centered community-based model for management of multi-drug resistant tuberculosis in Uganda: a discrete choice experiment
Source: Springer Nature journal article supplement (doi:10.1186/s12913-021-07365-5), 2022-02-05

Option

1

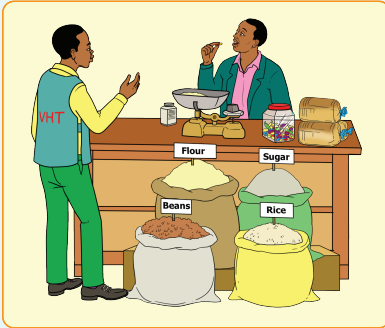

Community Health Worker giving treatment at work

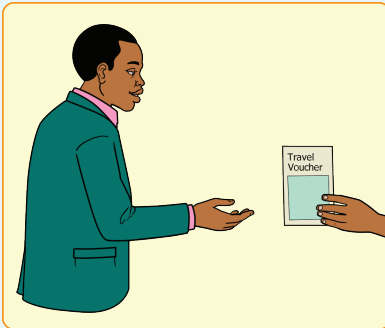

Monthly travel vouchers for monthly appointment

Option

2

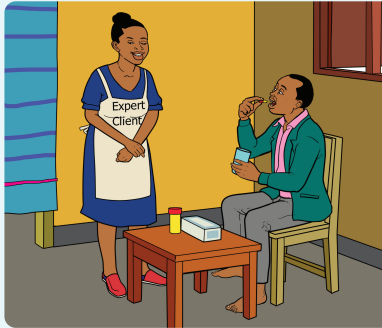

Expert Client giving treatment at home

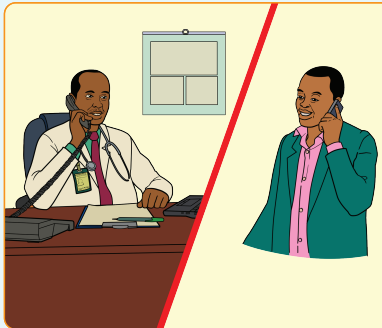

Phone call reminders for monthly appointments

Option

3

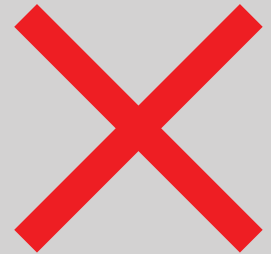

Supplement: MOESM1 [file 20103516]
